# Supplementary material for: Extracellular Vesicles as Markers and Mediators in Sepsis
Source: PubMed Central journal article supplement — Theranostics. 2018 May 23;8(12):3348–65. doi: 10.7150/thno.23453 (PMC6010985; doi:10.7150/thno.23453), 2018-05-23
Supplement: thnov08p3348s1.pdf [file thnov08p3348s1.pdf]

## **Supporting Information**

### **Extracellular Vesicles as Markers and Mediators in Sepsis**

Pierre Raeven, MD, PhD<sup>1,2\*</sup>

Johannes Zipperle, MSc.<sup>1</sup>

Susanne Drechsler, DVM<sup>1</sup>

1. Ludwig Boltzmann Institute for Experimental and Clinical Traumatology, Vienna, Austria.
2. Department of Anesthesiology, General Intensive Care Medicine and Pain Management, Medical University of Vienna, Vienna, Austria.

**\*Author to whom correspondence should be addressed:**

Pierre Raeven, Email: [pierre.raeven@meduniwien.ac.at](mailto:pierre.raeven@meduniwien.ac.at)

**Table S1. Important markers of extracellular vesicles derived from various cell types.**

| <b>Cell type</b>     | <b>Markers</b>                                                      |
|----------------------|---------------------------------------------------------------------|
| Total cells          | PhtdSer                                                             |
| Platelets            | Fibrinogen, CD61, CD42a, CD9, CD63, CD81, CD41, CD41a, PAC-1, CD62P |
| ECs                  | CD62e, CD144, CD146, CD105, CD106, TM, TF, EPCR, CD31, CD142        |
| Myeloid cell lineage | CD13                                                                |
| Leukocytes           | CD45, CD11a                                                         |
| Granulocytes         | CD65b, CD66b, PKH-26, CD16b, CD11b                                  |
| Monocytes            | CD14, CD15 CD11b, CD142                                             |
| Erythrocytes         | CD235a (GlycophorinA)                                               |
| Lymphocytes          | CD3, CD19, CD62L                                                    |

APC: activated protein C; CD: cluster of differentiation; EC: endothelial cell; EPCR: endothelial protein C receptor; PhtdSer: phosphatidylserine; TF: tissue factor; TM: thrombomodulin.
